# Supplementary material
Source: PubMed Central journal article supplement (PMC2703520)

**Filis et al: Supplemental Figure 1.**

**Latency to reproductive behaviours is affected in KO mice.**

(A) A Control or KO male was placed in a cage with an estrous female and videotaped for 30 mins. Graph shows the first time each of the 5 Control (open boxes, black dots) or 5 KO (shaded boxes, asterisks) males performed the denoted behaviours. Point “X” on the graph above the dotted line identifies those animals who never performed the behaviour within the 30 min videotaping period. Latency to all reproductive behaviours is clearly affected, although occurrence of mice not performing behaviour precludes statistical analysis.

(B) A stud male was placed in a cage with an estrous Control or KO female and videotaped for 30 mins. (i) Graph shows the mean  $\pm$  SEM of latency of stud males to performing appetitive aspects of reproductive behaviour when placed in a cage with Control (open boxes) or KO (shaded boxes) females, with no significant effect of the genotype of the female on any behaviour. (ii) Consummatory behaviour (mating – covers intromission and ejaculation, which are difficult to distinguish in mice) and self-grooming of genitals are graphed separately since, as with A, they include instances of mice not performing behaviours, precluding statistical analysis. Data indicates an effect of the KO estrous female in inducing increased latency of stud males to mating and self-grooming of genitals.

A: Latency of Control or KO male behaviour in response to estrous female.

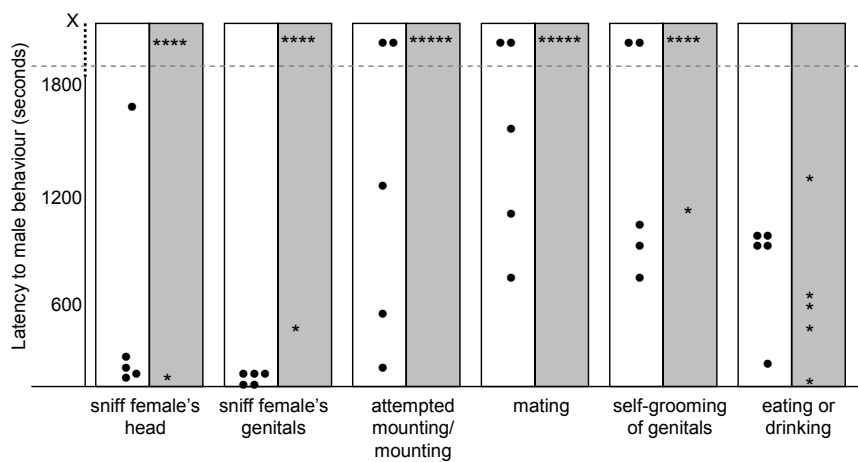

B: Latency of stud male behaviour in response to Control or KO estrous female.

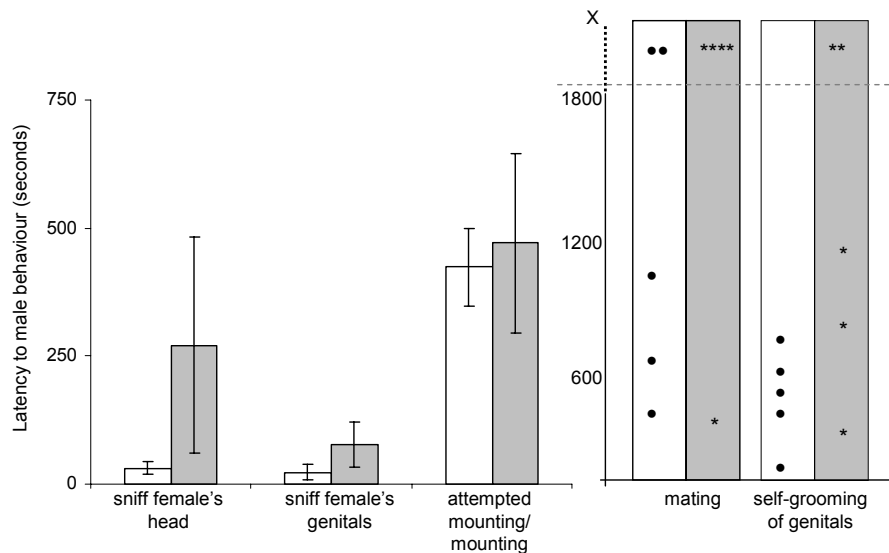

Supplement: en.2009-0214_1.pdf [file en.2009-0214_1.pdf]
